# Supplementary material for: 5hmC Level Predicts Biochemical Failure Following Radical Prostatectomy in Prostate Cancer Patients with ERG Negative Tumors
Source: MDPI journal article supplement (doi:10.3390/ijms20051025), 2019-02-27
Supplement: s1 [file s1]

Supplementary Materials:

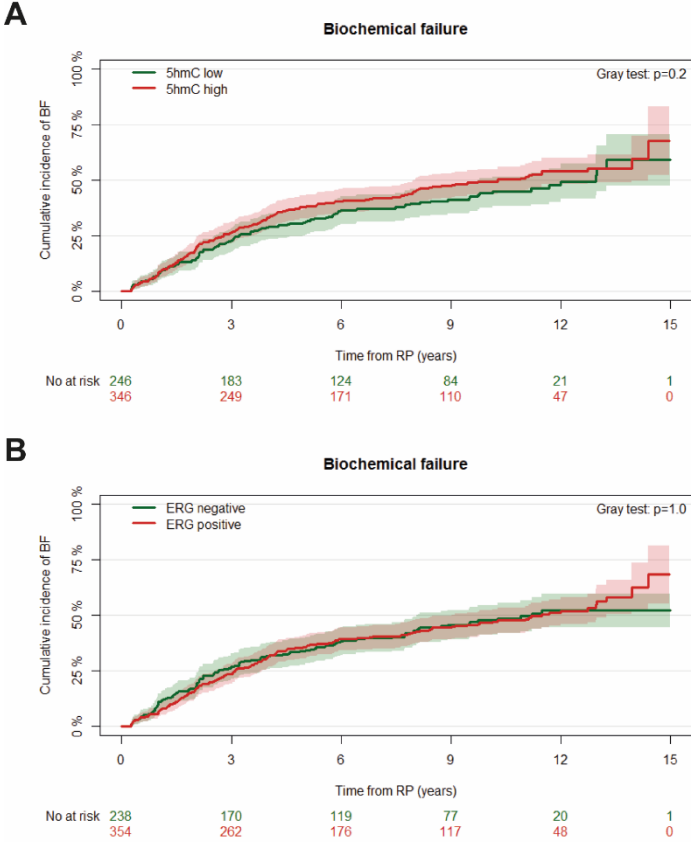

**Figure S1.** The cumulative incidence of biochemical failure (BF) following radical prostatectomy (RP). Competing events are death without BF. Patients are stratified according to (A) 5hmC level and (B) ERG expression. The  $p$ -values for Gray’s test are added.
